# Supplementary material
Source: MDPI journal article supplement (https://www.mdpi.com/2073-4344/12/12/1560)
Supplement: s1 [file s1]

## Supplemental information

# Interface Engineering of SRu-mC<sub>3</sub>N<sub>4</sub> Heterostructures for Enhanced Electrochemical Hydrazine Oxidation Reactions

Ajay Munde <sup>1,†</sup>, Priti Sharma <sup>2,†</sup>, Somnath Dhawale <sup>1</sup>, Ravishankar G. Kadam <sup>2</sup>, Subodh Kumar <sup>3</sup>, Hanumant B. Kale <sup>4</sup>, Jan Filip <sup>2</sup>, Radek Zboril <sup>2,5</sup>, Bhaskar R. Sathe <sup>1,\*</sup> and Manoj B. Gawande <sup>2,4,\*</sup>

<sup>1</sup> Department of Chemistry, Dr. Babasaheb Ambedkar Marathwada University, Aurangabad 431004, Maharashtra, India

<sup>2</sup> Regional Centre of Advanced Technologies and Materials, Czech Advanced Technology and Research Institute, Palacký University, Šlechtitelů 27, 779 00 Olomouc, Czech Republic

<sup>3</sup> Department of Inorganic Chemistry, Faculty of Science, Palacký University, 17. Listopadu 12, 771 46 Olomouc, Czech Republic

<sup>4</sup> Department of Industrial and Engineering Chemistry, Institute of Chemical Technology, Mumbai-Marathwada Campus, Jalna 431213, Maharashtra, India

<sup>5</sup> CEET, Nanotechnology Centre, VŠB–Technical University of Ostrava, 17. Listopadu 2172/15, 708 00 Ostrava, Czech Republic

\* Correspondence: bsathe.chemistry@bamu.ac.in (B.R.S.); mb.gawande@marj.ictmumbai.edu.in (M.B.G.)

† These authors contributed equally to this work.

### Supplemental information list

S-1) Synthesis method

S-2) Wide-angle XRD pattern

S-3) High-resolution XPS spectra

S-4) Electrochemical studies

S-5) HR-TEM images and Raman spectra of recovered SRu-mC<sub>3</sub>N<sub>4</sub> catalyst after electrocatalytic hydrazine oxidation

S-6) Calculation for enhancement factor

Table S1) Electrochemical performance of previously reported HzOR systems from the literature

S-1) Synthesis methods

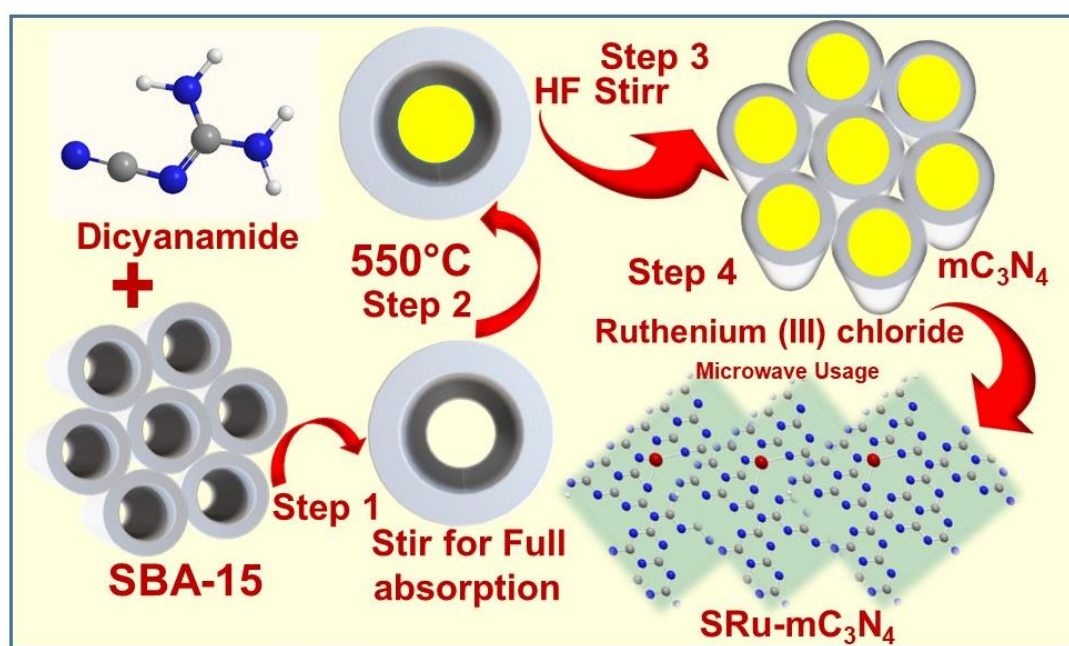

**Scheme S1.** Schematic representation for protocol depicting formulation of ruthenium single atom over mesoporous C<sub>3</sub>N<sub>4</sub> (SRu-mC<sub>3</sub>N<sub>4</sub>).

## S-2) Wide-angle XRD pattern

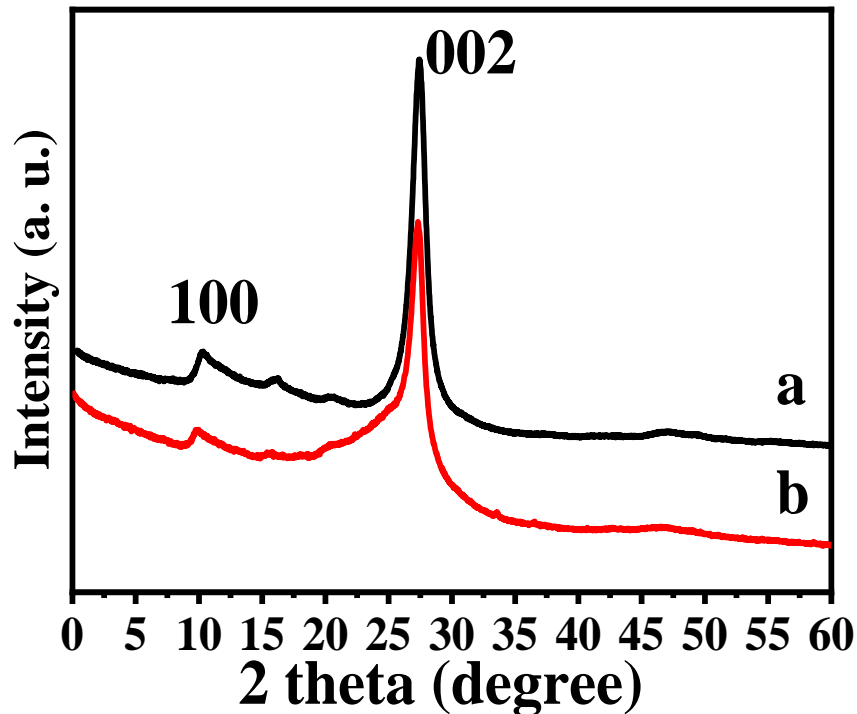

**Figure S1.** Wide-angle XRD pattern of SRu-mC<sub>3</sub>N<sub>4</sub>; a) mC<sub>3</sub>N<sub>4</sub>; and b) SRu-mC<sub>3</sub>N<sub>4</sub>.

## S-3) High-resolution XPS spectra

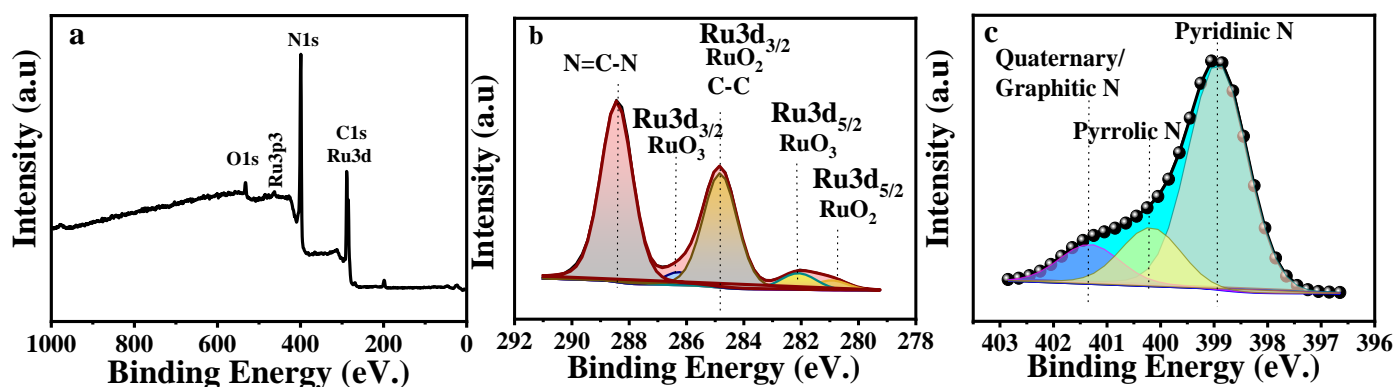

**Figure S2.** High-resolution XPS spectra of SRu-mC<sub>3</sub>N<sub>4</sub>: a) Full scan; b) N1s spectra of SRu-mC<sub>3</sub>N<sub>4</sub>; c) Ru 3d High-resolution XPS spectra of SRu-mC<sub>3</sub>N<sub>4</sub> with carbon.

#### S-4) Electrochemical Studies

##### i) Linear sweep voltammetry (LSV)

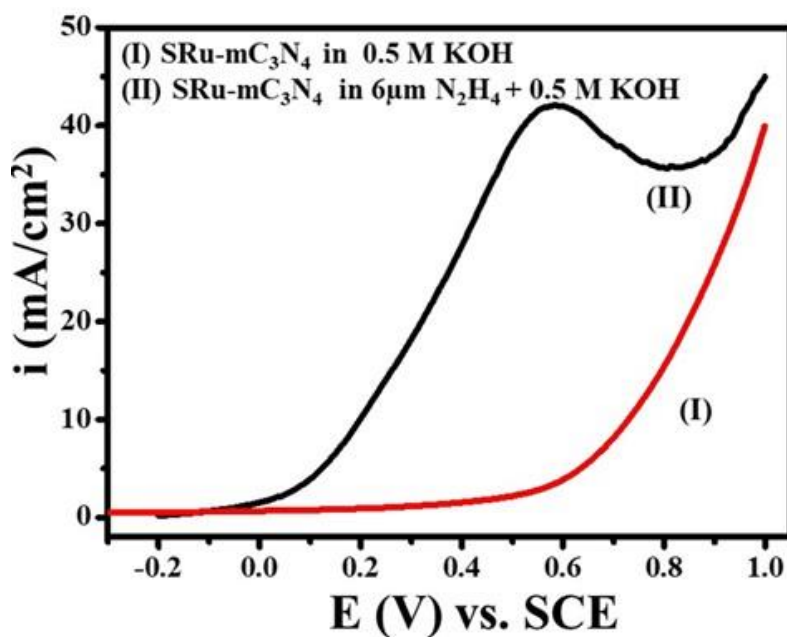

**Figure S3.** Superimposed linear sweep voltammetry (LSV) for the (I) SRu-mC<sub>3</sub>N<sub>4</sub> in 0.5 M KOH (II) SRu-mC<sub>3</sub>N<sub>4</sub> in 6  $\mu$ M N<sub>2</sub>H<sub>4</sub> + 0.5 M KOH at a scan rate of 50 mV/s.

##### ii) Chronoamperometric studies

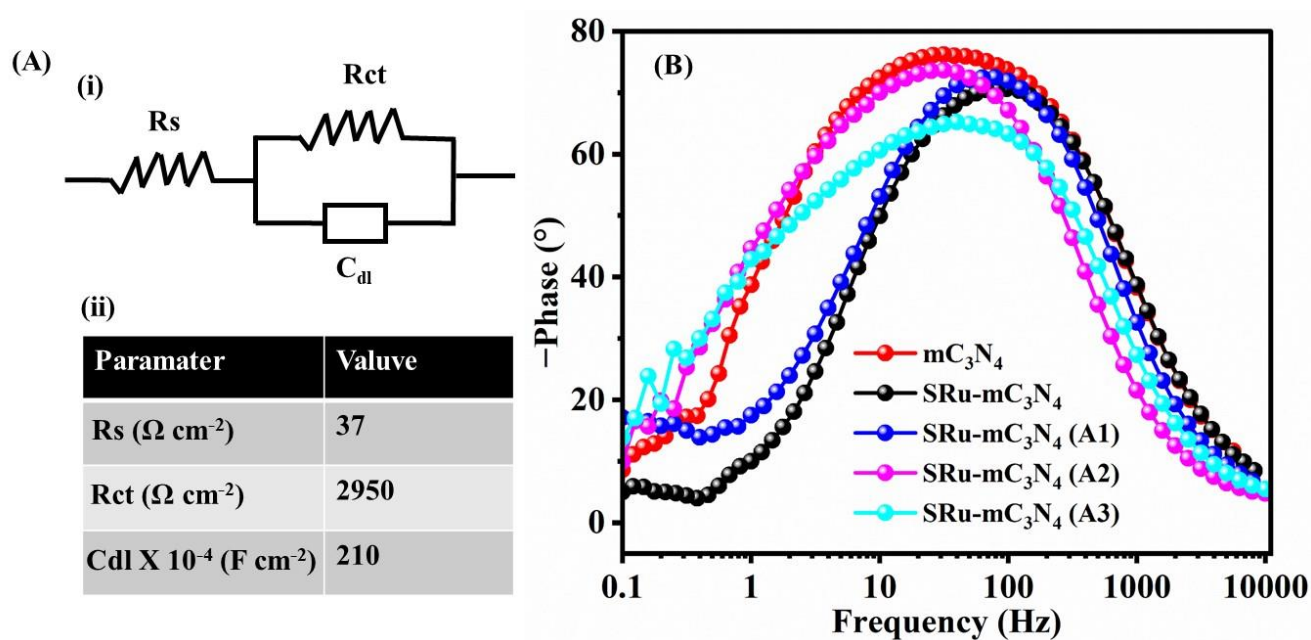

**Figure S4.** (A) (i) equivalent circuit and (ii) their values for  $SRu-mC_3N_4$ , (B) Bode plot calculated by using EIS data of different electrocatalysts in  $6\mu\text{M N}_2\text{H}_4 + 0.5\text{ M KOH}$ .

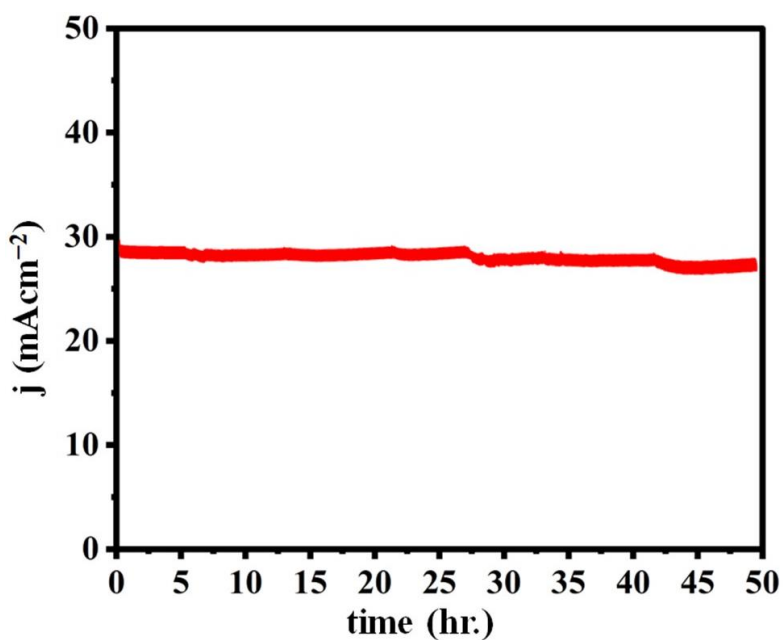

**Figure S5.** Chronoamperometric studies of  $SRu-mC_3N_4$  in  $6\mu\text{M N}_2\text{H}_4 + 0.5\text{ M KOH}$  at an applied potential of  $1.3\text{ V vs. RHE}$  (based on obtained current density of  $20\text{ mA/cm}^2$ ).

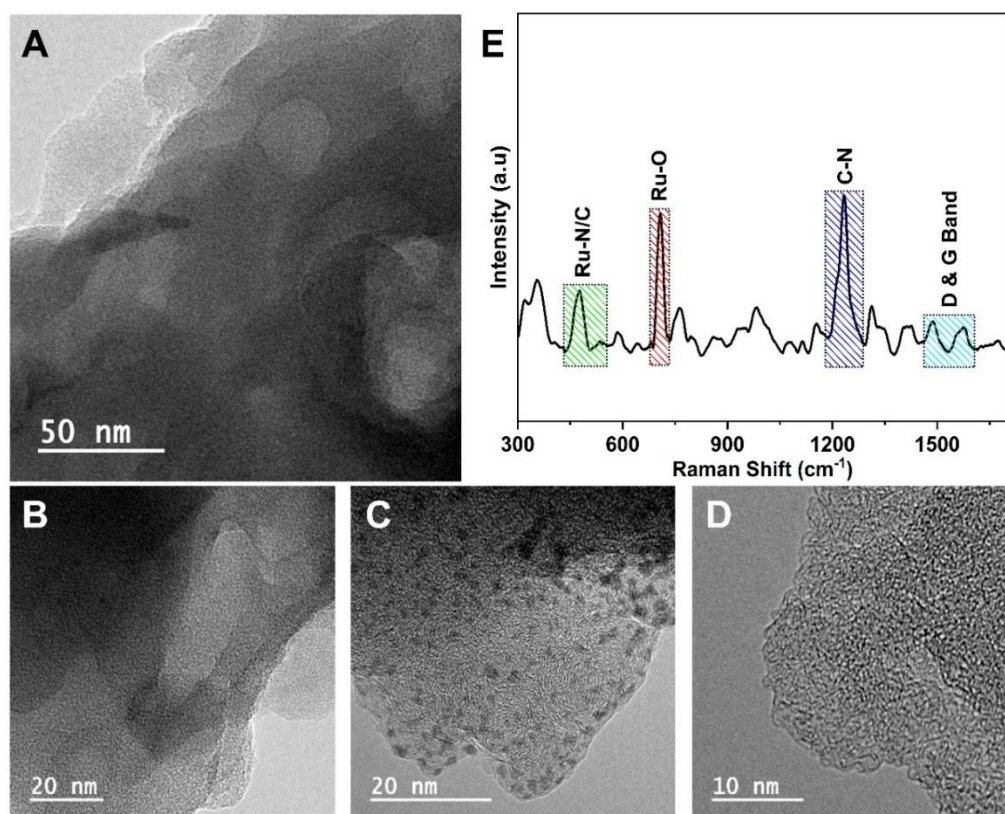

**Figure S6.** (A–D) HR-TEM images, and (E) Raman spectra of SRu-mC<sub>3</sub>N<sub>4</sub> catalyst after electrocatalytic hydrazine oxidation reaction study.

#### S-6) Calculation for enhancement factor

We determined the electrocatalyst's enhancement factor (EF) at a fixed voltage. SRu-mC<sub>3</sub>N<sub>4</sub> is a more effective electrocatalyst than bare GCE, m-C<sub>3</sub>N<sub>4</sub>, SRu-mC<sub>3</sub>N<sub>4</sub> (A1), SRu-mC<sub>3</sub>N<sub>4</sub> (A3), and SRu-mC<sub>3</sub>N<sub>4</sub> (A2) in a 6  $\mu$ M N<sub>2</sub>H<sub>4</sub> + 0.5 M KOH solution, according to the electrocatalytic activity given in Table 1 based on enhancing factor (EF). The enhancement factor (EF) of SRu-mC<sub>3</sub>N<sub>4</sub> is higher (2258) than that of m-C<sub>3</sub>N<sub>4</sub> (376), SRu-mC<sub>3</sub>N<sub>4</sub> (A1; 617), SRu-mC<sub>3</sub>N<sub>4</sub> (A3; 386) and SRu-mC<sub>3</sub>N<sub>4</sub> (A2; 364) in 6  $\mu$ M N<sub>2</sub>H<sub>4</sub> + 0.5 M KOH.

$$\text{Enhancement Factor (EF)} = \frac{\text{current density of electrocatalyst}}{\text{Current density of bare GCE}} \times 100$$

**Table S1.** Electrochemical performance of previously reported HzOR systems from the literature.

| Sr. No. | Electrocatalyst                         | Electrolyte KOH/N <sub>2</sub> H <sub>4</sub> | 10 mA/cm <sup>2</sup> (V vs. RHE ) | Stability (h) | Reference |
|---------|-----------------------------------------|-----------------------------------------------|------------------------------------|---------------|-----------|
| 1       | Ag NPs                                  | 0.5 M /0.5 mL                                 | 1.57                               | -             | [40]      |
|         | Ag@C60                                  |                                               | 1.21                               | -             |           |
| 2       | Au-TiO <sub>2</sub>                     | 0.1 M / 3 mM                                  | 1.18                               | -             | [41]      |
| 3       | (Cu <sub>0.9</sub> Pd <sub>0.1</sub> )O | 0.1 M /10 mM                                  | 1.32                               | 0.5           | [42]      |
| 4       | Ni@Pd-Ni alloy NAs                      | 1 M/20 mM                                     | 0.94                               | 0.35          | [43]      |
| 5       | MoCx-NC                                 | 0.1 M/0.02 M                                  | -                                  | 0.78          | [44]      |
| 6       | PdSn/MWCNT                              | 1 M/0.5 M                                     | 1.15                               |               | [45]      |

|    |                                            |                                   |             |           |                  |
|----|--------------------------------------------|-----------------------------------|-------------|-----------|------------------|
| 7  | Concave TOH Au NCs                         | 0.1 M /10 mM                      | 1.32        | 10        | [46]             |
| 8  | Rh/NiFe <sub>-5.4</sub>                    | 1 M/0.2 M                         | 1.38        | 5.5       | [47]             |
| 9  | Ru <sub>1</sub> /mono-NiFe <sub>-0.3</sub> | 1 M/0.2 M                         | 1.34        | -         | [48]             |
| 10 | <b>SRu-mC<sub>3</sub>N<sub>4</sub></b>     | <b>0.5 M /6 <math>\mu</math>M</b> | <b>1.19</b> | <b>50</b> | <b>This Work</b> |

## References

- Narwade, S.S.; Mulik, B.B.; Mali, S.M.; Sathe, B.R. Silver Nanoparticles Sensitized C60(Ag@C60) as Efficient Electrocatalysts for Hydrazine Oxidation: Implication for Hydrogen Generation Reaction. *Appl. Surf. Sci.* **2017**, *396*, 939–944, doi:10.1016/j.apsusc.2016.11.065.
- Roy, N.; Bhunia, K.; Terashima, C.; Fujishima, A.; Pradhan, D. Citrate-Capped Hybrid Au-TiO<sub>2</sub> Nanomaterial for Facile and Enhanced Electrochemical Hydrazine Oxidation. *ACS Omega* **2017**, *2*, 1215–1221, doi:10.1021/acsomega.6b00566.
- Zhang, X.; Shi, S.; Yin, H. CuPd Alloy Oxide Nanobelts as Electrocatalyst Towards Hydrazine Oxidation. *ChemElectroChem* **2019**, *6*, 1514–1519, doi:10.1002/celc.201900148.
- Du, M.; Sun, H.; Li, J.; Ye, X.; Yue, F.; Yang, J.; Liu, Y.; Guo, F. Integrative Ni@Pd-Ni Alloy Nanowire Array Electrocatalysts Boost Hydrazine Oxidation Kinetics. *ChemElectroChem* **2019**, *6*, 5581–5587, doi:10.1002/celc.201901303.
- Deng, J.; Li, X.; Imhanria, S.; Chen, K.; Deng, X.; Wang, W. Molybdenum Carbide-Nitrogen Doped Carbon Composites as Effective Non-Precious Electrocatalyst for Direct Hydrazine Fuel Cell. *Electrochim. Acta* **2021**, *384*, 138417, doi:10.1016/j.electacta.2021.138417.
- Er, O.F.; Cavak, A.; Aldemir, A.; Kivrak, H. Hydrazine Electrooxidation Activities of Novel Carbon Nanotube Supported Tin Modified Palladium Nanocatalysts. *Surfaces and Interfaces* **2022**, *28*, 101680, doi:10.1016/j.surfin.2021.101680.
- Liu, F.; Jiang, X.; Wang, H.-H.; Chen, C.; Yang, Y.-H.; Sheng, T.; Wei, Y.-S.; Zhao, X.-S.; Wei, L. Boosting Electrocatalytic Hydrazine Oxidation Reaction on High-Index Faceted Au Concave Trioctahedral Nanocrystals. *ACS Sustain. Chem. Eng.* **2022**, *10*, 696–702, doi:10.1021/acssuschemeng.1c07700.
- Liu, G.; Wang, Z.; Shen, T.; Zheng, X.; Zhao, Y.; Song, Y.-F. Atomically Dispersed Rh-Doped NiFe Layered Double Hydroxides: Precise Location of Rh and Promoting Hydrazine Electrooxidation Properties. *Nanoscale* **2021**, *13*, 1869–1874, doi:10.1039/D0NR07157A.
- Wang, Z.; Xu, S.-M.; Xu, Y.; Tan, L.; Wang, X.; Zhao, Y.; Duan, H.; Song, Y.-F. Single Ru Atoms with Precise Coordination on a Monolayer Layered Double Hydroxide for Efficient Electrooxidation Catalysis. *Chem. Sci.* **2019**, *10*, 378–384, doi:10.1039/C8SC04480E.
